# Supplementary figures and images for: Sulfonation of carbonized xylan-type hemicellulose: a renewable and effective biomass-based biocatalyst for the synthesis of O- and N-heterocycles
Source: Royal Society of Chemistry journal article supplement (doi:10.1039/c8nj01329b), 2018-01-01

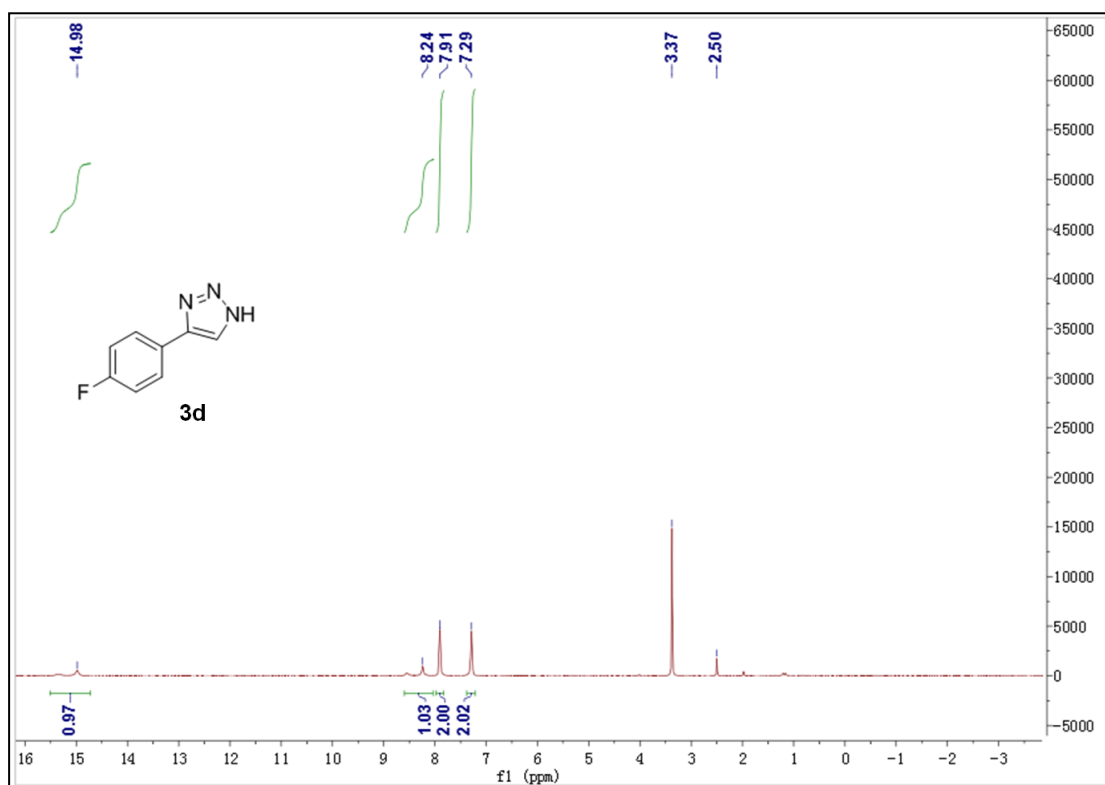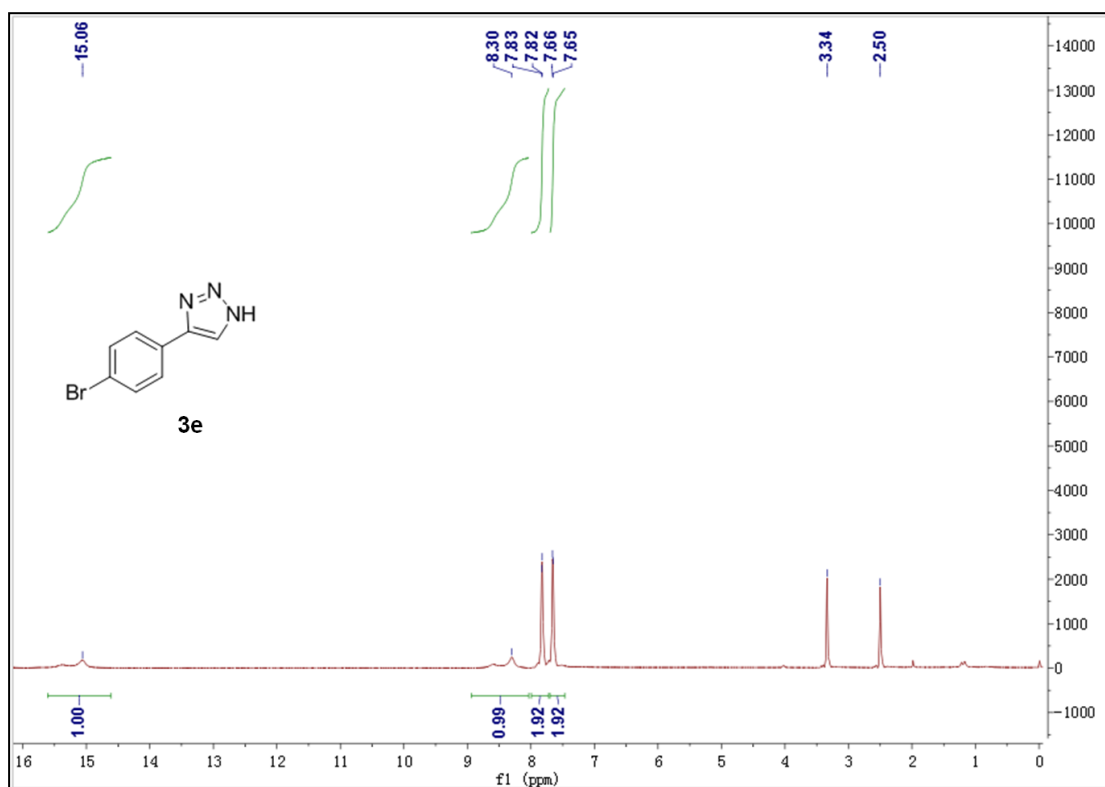

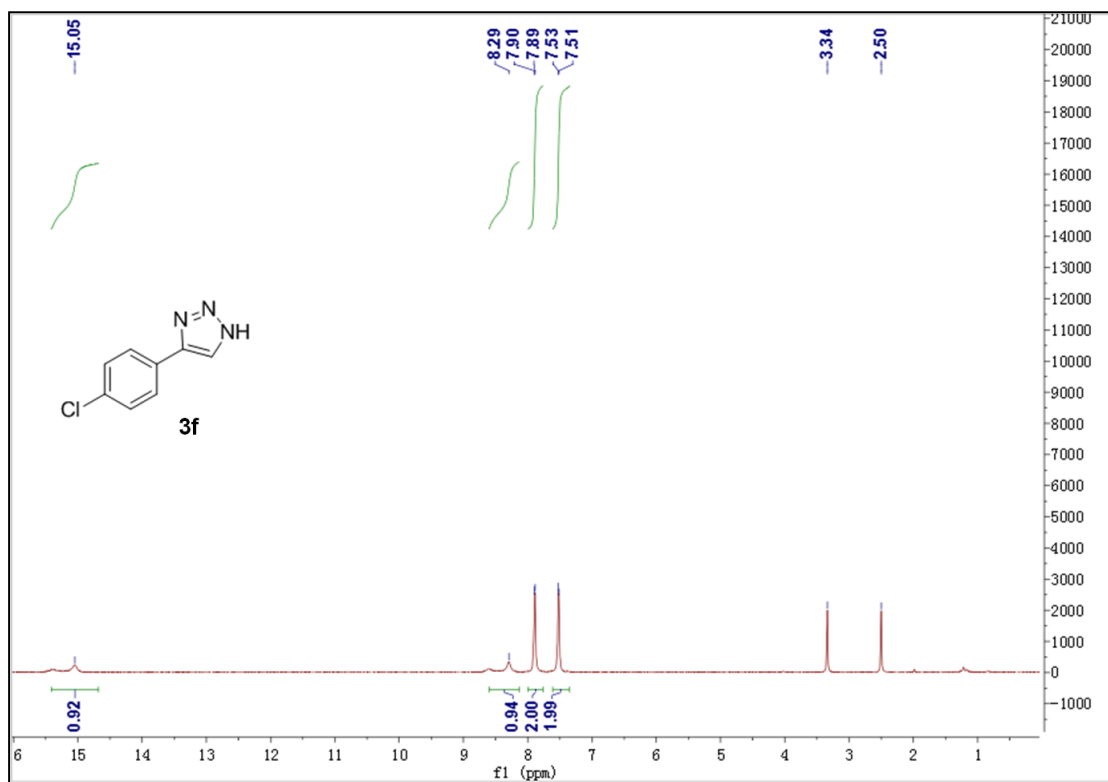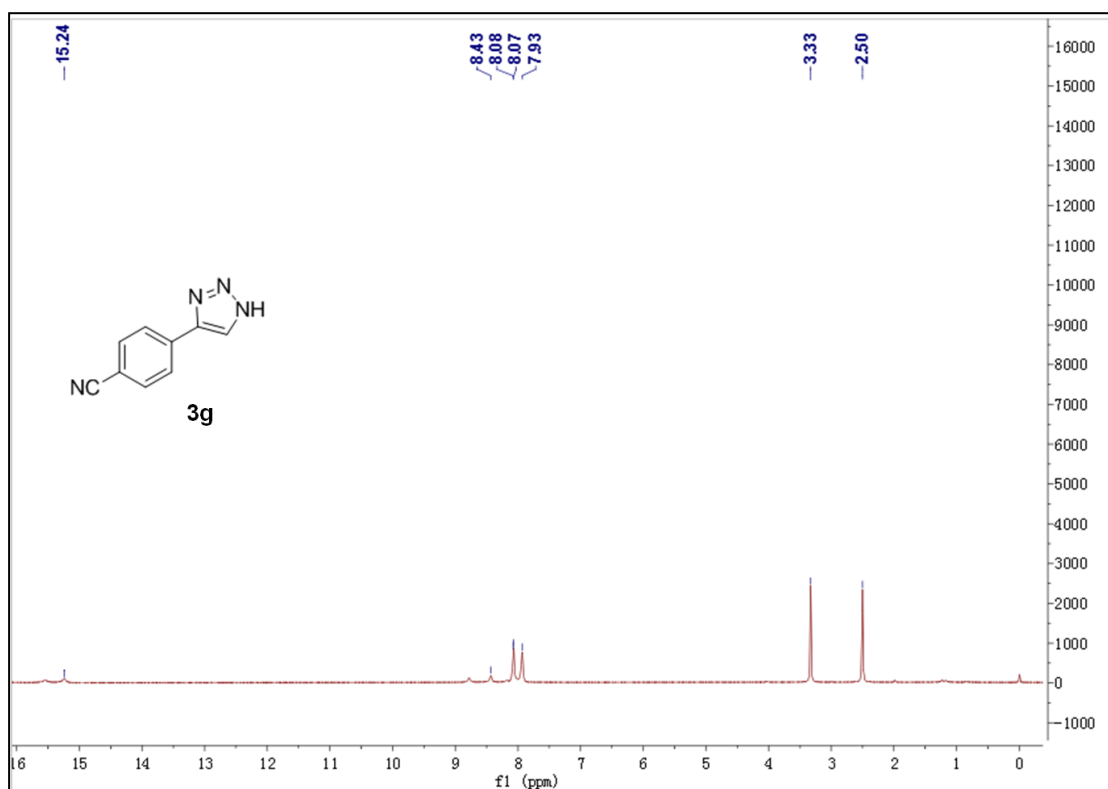

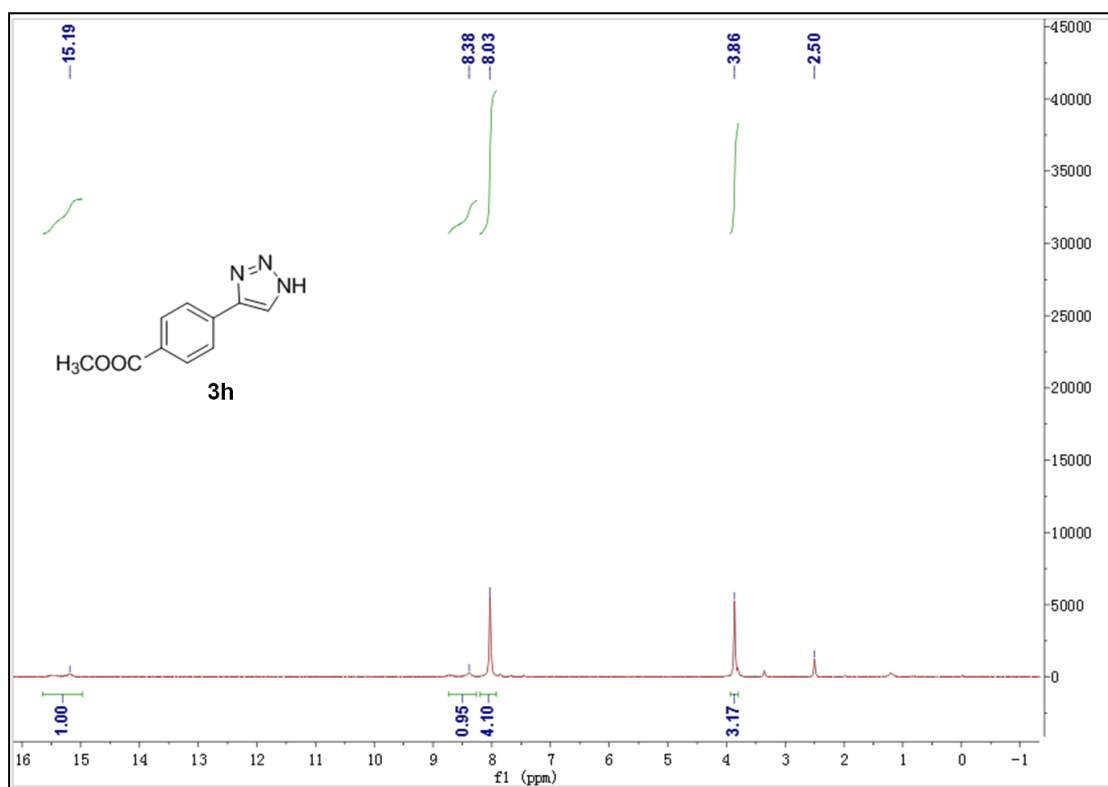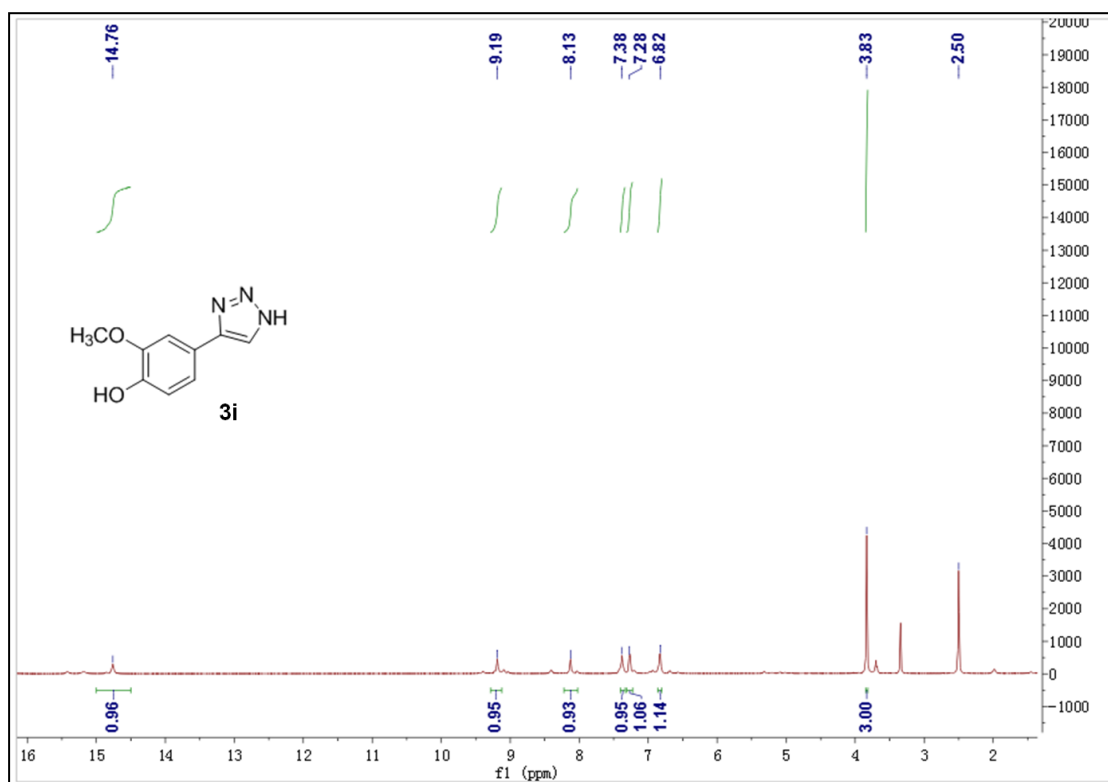

# <sup>13</sup>C NMR for all compounds

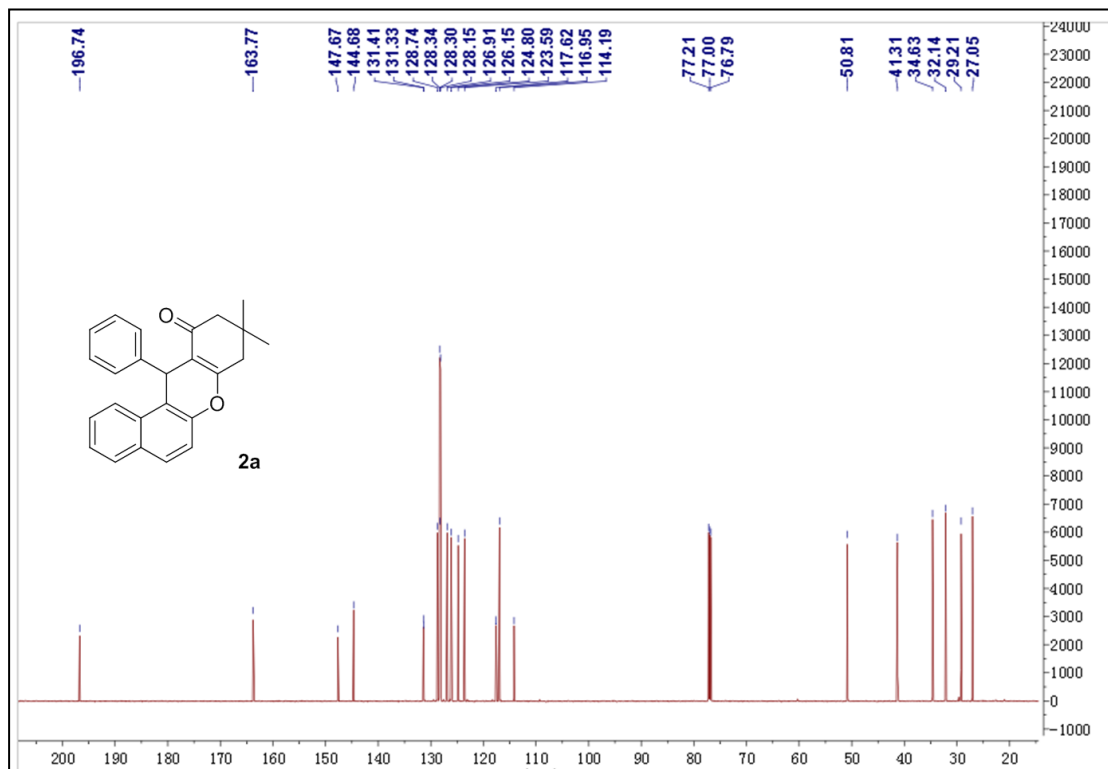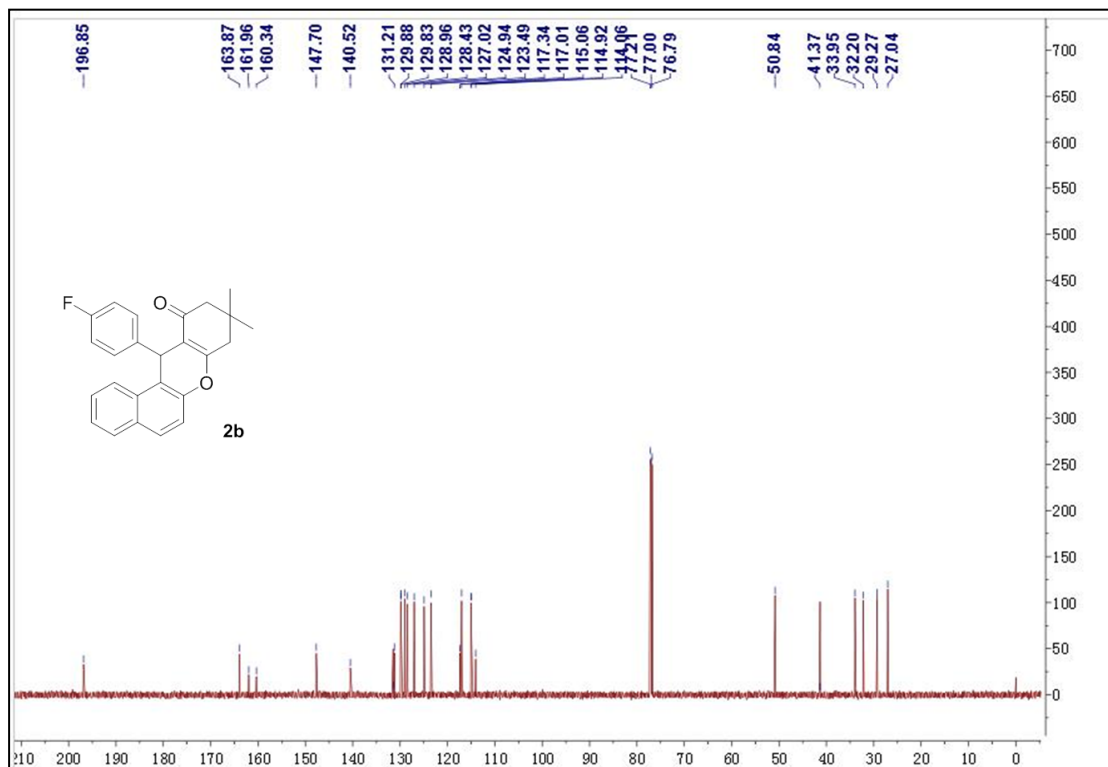

Supplement: c8nj01329b1.pdf [file c8nj01329b1.pdf]
